# Supplementary material for: Systematic Clustering of Transcription Start Site Landscapes
Source: PubMed Central journal article supplement (PMC3160847; doi:10.1371/journal.pone.0023409), 2011-08-24
Supplement: pone.0023409.s002.pdf [file pone.0023409.s002.pdf]

**Table S1. CAGE data sets**

| <b>Data set for clustering</b> | <b>Number of TSSDs<br/>(with no less than 100 tags)</b> | <b>Number of tags</b> |
|--------------------------------|---------------------------------------------------------|-----------------------|
| FANTOM3 Mouse                  | 7752                                                    | 5463328               |
| FANTOM3 Mouse liver            | 2656                                                    | 1491547               |
| FANTOM3 Mouse embryo           | 1341                                                    | 643883                |
| FANTOM3 Human                  | 5298                                                    | 3664127               |
| FANTOM4 Human                  | 9201                                                    | 11030288 (TPM)        |
