# Supplementary material for: Systematic Clustering of Transcription Start Site Landscapes
Source: PubMed Central journal article supplement (PMC3160847; doi:10.1371/journal.pone.0023409), 2011-08-24
Supplement: pone.0023409.s003.pdf [file pone.0023409.s003.pdf]

**Table S2. Clustering stabilities****A. Hierarchical clustering**

|                 | <b>Hierarchical clustering</b> |                          |                                 |                                |                          |
|-----------------|--------------------------------|--------------------------|---------------------------------|--------------------------------|--------------------------|
| <b><i>k</i></b> | <b>FANTOM3<br/>Mouse</b>       | <b>FANTOM3<br/>Human</b> | <b>FANTOM3<br/>Mouse embryo</b> | <b>FANTOM3<br/>Mouse liver</b> | <b>FANTOM4<br/>Human</b> |
| 2               | 0.73                           | 0.78                     | 0.74                            | 0.78                           | 0.91                     |
| 3               | 0.61                           | 0.65                     | 0.74                            | 0.67                           | 0.66                     |
| 4               | 0.63                           | 0.54                     | 0.71                            | 0.57                           | 0.65                     |
| 5               | 0.58                           | 0.59                     | 0.63                            | 0.55                           | 0.56                     |
| 6               | 0.54                           | 0.53                     | 0.61                            | 0.51                           | 0.55                     |
| 7               | 0.52                           | 0.52                     | 0.58                            | 0.48                           | 0.53                     |
| 8               | 0.48                           | 0.50                     | 0.51                            | 0.48                           | 0.53                     |
| 9               | 0.47                           | 0.48                     | 0.50                            | 0.48                           | 0.55                     |
| 10              | 0.46                           | 0.47                     | 0.50                            | 0.47                           | 0.55                     |
| 15              | 0.43                           | 0.46                     | 0.48                            | 0.46                           | 0.50                     |
| 20              | 0.41                           | 0.40                     | 0.48                            | 0.45                           | 0.44                     |
| 25              | 0.40                           | 0.42                     | 0.49                            | 0.42                           | 0.43                     |
| 30              | 0.38                           | 0.42                     | 0.49                            | 0.42                           | 0.42                     |
| 40              | 0.37                           | 0.39                     | 0.49                            | 0.42                           | 0.42                     |
| 50              | 0.34                           | 0.39                     | 0.47                            | 0.42                           | 0.41                     |

**B. *k*-medoids**

|                 | <b><i>k</i>-medoids</b>  |                          |                                 |                                |                          |
|-----------------|--------------------------|--------------------------|---------------------------------|--------------------------------|--------------------------|
| <b><i>k</i></b> | <b>FANTOM3<br/>Mouse</b> | <b>FANTOM3<br/>Human</b> | <b>FANTOM3<br/>Mouse embryo</b> | <b>FANTOM3<br/>Mouse liver</b> | <b>FANTOM4<br/>Human</b> |
| 2               | 0.95                     | 0.99                     | 0.97                            | 0.99                           | 0.99                     |
| 3               | 0.93                     | 0.91                     | 0.93                            | 0.95                           | 0.97                     |
| 4               | 0.85                     | 0.89                     | 0.86                            | 0.83                           | 0.92                     |
| 5               | 0.85                     | 0.80                     | 0.80                            | 0.79                           | 0.86                     |
| 6               | 0.73                     | 0.75                     | 0.73                            | 0.67                           | 0.84                     |
| 7               | 0.80                     | 0.80                     | 0.64                            | 0.67                           | 0.80                     |
| 8               | 0.66                     | 0.64                     | 0.65                            | 0.63                           | 0.80                     |
| 9               | 0.61                     | 0.69                     | 0.64                            | 0.62                           | 0.67                     |
| 10              | 0.58                     | 0.63                     | 0.63                            | 0.59                           | 0.71                     |
| 15              | 0.57                     | 0.58                     | 0.57                            | 0.51                           | 0.74                     |
| 20              | 0.55                     | 0.53                     | 0.55                            | 0.49                           | 0.62                     |
| 25              | 0.54                     | 0.54                     | 0.57                            | 0.47                           | 0.58                     |
| 30              | 0.52                     | 0.53                     | 0.57                            | 0.52                           | 0.55                     |
| 40              | 0.49                     | 0.52                     | 0.50                            | 0.51                           | 0.52                     |
| 50              | 0.48                     | 0.46                     | 0.49                            | 0.49                           | 0.53                     |
