# Supplementary material for: Systematic Clustering of Transcription Start Site Landscapes
Source: PubMed Central journal article supplement (PMC3160847; doi:10.1371/journal.pone.0023409), 2011-08-24
Supplement: pone.0023409.s004.pdf [file pone.0023409.s004.pdf]

**Table S3. Cluster analysis of five data sets by two-level clustering**

| <b>Data set for clustering</b> | <b>TSSDs</b>     |              |                    | <b>Total TSSDs</b> |
|--------------------------------|------------------|--------------|--------------------|--------------------|
|                                | <b>Scattered</b> | <b>Dense</b> | <b>Ultra-dense</b> |                    |
| FANTOM3 Mouse                  | 7095 (91.5%)     | 334 (4.3%)   | 323 (4.2%)         | 7752               |
| FANTOM3 Mouse liver            | 2398 (92.3%)     | 149 (5.6%)   | 109 (4.1%)         | 2656               |
| FANTOM3 Mouse embryo           | 1097 (81.8%)     | 152 (11.3%)  | 92 (6.7%)          | 1341               |
| FANTOM3 Human                  | 4749 (89.6%)     | 247 (4.7%)   | 302 (5.7%)         | 5298               |
| FANTOM4 Human                  | 7987 (86.8%)     | 516 (5.6%)   | 698 (7.6%)         | 9201               |
