# Supplementary material for: Systematic Clustering of Transcription Start Site Landscapes
Source: PubMed Central journal article supplement (PMC3160847; doi:10.1371/journal.pone.0023409), 2011-08-24
Supplement: pone.0023409.s005.pdf [file pone.0023409.s005.pdf]

**Table S4. CAGE tags mapped to different genomic regions**

| <b>Group</b> | <b>TSS(-300~+301nt)</b> | <b>Upstream(-2000~-299nt)</b> | <b>3'-UTR</b> | <b>Exon</b> | <b>Intron</b> |
|--------------|-------------------------|-------------------------------|---------------|-------------|---------------|
| scattered    | 5951                    | 234                           | 95            | 4088        | 378           |
| dense        | 175                     | 13                            | 20            | 132         | 26            |
| ultra-dense  | 22                      | 3                             | 3             | 17          | 43            |
