# Supplementary material for: Systematic Clustering of Transcription Start Site Landscapes
Source: PubMed Central journal article supplement (PMC3160847; doi:10.1371/journal.pone.0023409), 2011-08-24
Supplement: pone.0023409.s006.pdf [file pone.0023409.s006.pdf]

**Table S5. TSSD annotation****A. RefSeq annotation of TSSDs**

| <b>group</b> | <b>RefSeq-annotated TSSDs (%)</b> | <b>RefSeq-unannotated TSSDs (%)</b> | <b>Total</b> |
|--------------|-----------------------------------|-------------------------------------|--------------|
| scattered    | 6262 (88.26%)                     | 833 (11.74%)                        | 7095         |
| dense        | 183 (54.79%)                      | 151 (45.21%)                        | 334          |
| ultra-dense  | 28 (8.67%)                        | 295 (91.33%)                        | 323          |

**B. EST/mRNA support of the transcribed and pseudo- RP-gene promoter TSSDs**

| <b>group</b> | <b>Count of RefSeq-annotated RP-gene promoters, the count of these promoters with mouse EST/mRNA support, their ratio in percentage</b> | <b>Count of RP pseudogene promoters (annotated by “Other RefSeq”), the count of these promoters with mouse EST/mRNA support, their ratio in percentage</b> |
|--------------|-----------------------------------------------------------------------------------------------------------------------------------------|------------------------------------------------------------------------------------------------------------------------------------------------------------|
| scattered    | 122, 110, 90.16%                                                                                                                        | 833, 4, 0.48%                                                                                                                                              |
| dense        | 3, 2, 66.67%                                                                                                                            | 151, 5, 3.31%                                                                                                                                              |
| ultra-dense  | 2, 2, 100%                                                                                                                              | 295, 25, 8.47%                                                                                                                                             |

**C. EST, mRNA and “Other RefSeq” evidence for mouse RefSeq-unannotated TSSDs.**

| <b>group</b> | <b>TSSDs without mouse RefSeq annotation</b> |                                           |                                                                                |                                                                                   |
|--------------|----------------------------------------------|-------------------------------------------|--------------------------------------------------------------------------------|-----------------------------------------------------------------------------------|
|              | <b>Total</b>                                 | <b>TSSDs associated with EST/mRNA (%)</b> | <b>TSSDs associated with EST/mRNA and gene evidence from other species (%)</b> | <b>TSSDs associated with EST/mRNA and RP-gene evidence from other species (%)</b> |
| scattered    | 833                                          | 805 (96.64%)                              | 371 (44.54%)                                                                   | 4 (0.48%)                                                                         |
| dense        | 151                                          | 69 (45.7%)                                | 17 (11.26%)                                                                    | 5 (3.31%)                                                                         |
| ultra-dense  | 295                                          | 136 (46.1%)                               | 75 (25.42%)                                                                    | 25 (8.47%)                                                                        |
