# Supplementary material for: Systematic Clustering of Transcription Start Site Landscapes
Source: PubMed Central journal article supplement (PMC3160847; doi:10.1371/journal.pone.0023409), 2011-08-24
Supplement: pone.0023409.s007.pdf [file pone.0023409.s007.pdf]

**Table S6. Tissue usage correlations**

| <b>Pseudogene</b>  | <b>Transcribed gene</b> | <b><i>r</i></b> | <b>P-value</b> |
|--------------------|-------------------------|-----------------|----------------|
| Pseudogene MRPL23  | Transcribed Mrpl23      | 0.900           | 1.246E-08      |
| Pseudogene RPS11   | Transcribed Rps11       | 0.721           | 1.519E-04      |
| Pseudogene RPS29   | Transcribed Rps29       | 0.861           | 2.650E-07      |
| Pseudogene RPL5    | Transcribed Rpl5        | 0.546           | 8.591E-03      |
| Pseudogene RPLP0P2 | Transcribed Rplp0       | 0.803           | 6.831E-06      |
| Pseudogene Rpl41   | Transcribed Rpl41       | 0.794           | 1.041E-05      |
| Pseudogene RPL41   | Transcribed Rpl41       | 0.824           | 2.417E-06      |
| Pseudogene rps12   | Transcribed Rps12       | 0.683           | 4.635E-04      |
| Pseudogene RPS3A   | Transcribed Rps3a       | 0.898           | 1.439E-08      |
| Pseudogene RPL19   | Transcribed Rpl19       | 0.949           | 1.634E-11      |
| Pseudogene RPS10   | Transcribed Rps10       | 0.799           | 8.107E-06      |
| Pseudogene Fau     | Transcribed Fau         | 0.830           | 1.727E-06      |
