# Supplementary material for: Systematic Clustering of Transcription Start Site Landscapes
Source: PubMed Central journal article supplement (PMC3160847; doi:10.1371/journal.pone.0023409), 2011-08-24

**Figure S1. Explained variance by 1<sup>st</sup>-level clustering**

**A. Hierarcical clustering**

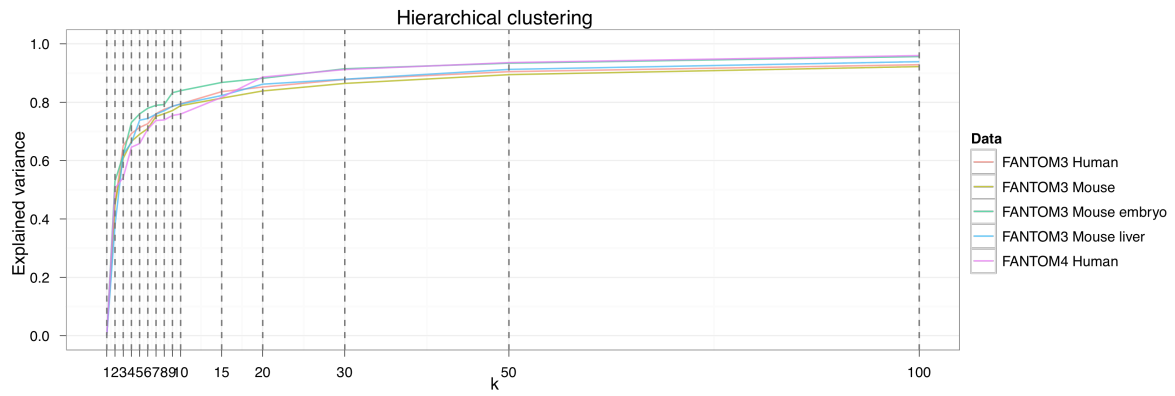

**B. k-medoids clustering**

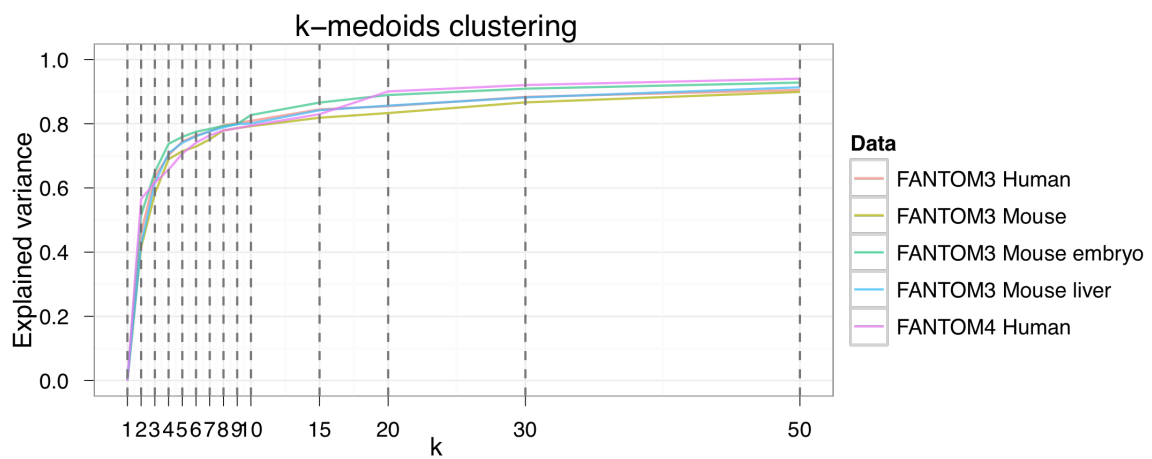

Supplement: pone.0023409.s008.pdf [file pone.0023409.s008.pdf]
