# Supplementary material for: Systematic Clustering of Transcription Start Site Landscapes
Source: PubMed Central journal article supplement (PMC3160847; doi:10.1371/journal.pone.0023409), 2011-08-24

Figure S2. Explained variance by 2<sup>nd</sup>-level clustering (*k*-means)

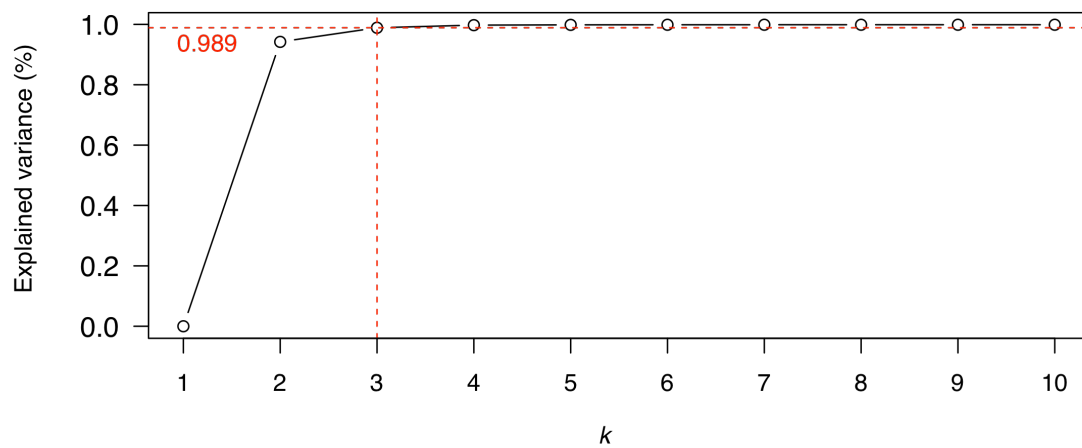

Supplement: pone.0023409.s009.pdf [file pone.0023409.s009.pdf]
