# Supplementary material for: Systematic Clustering of Transcription Start Site Landscapes
Source: PubMed Central journal article supplement (PMC3160847; doi:10.1371/journal.pone.0023409), 2011-08-24

Figure S5. Patterns of epigenetic marks

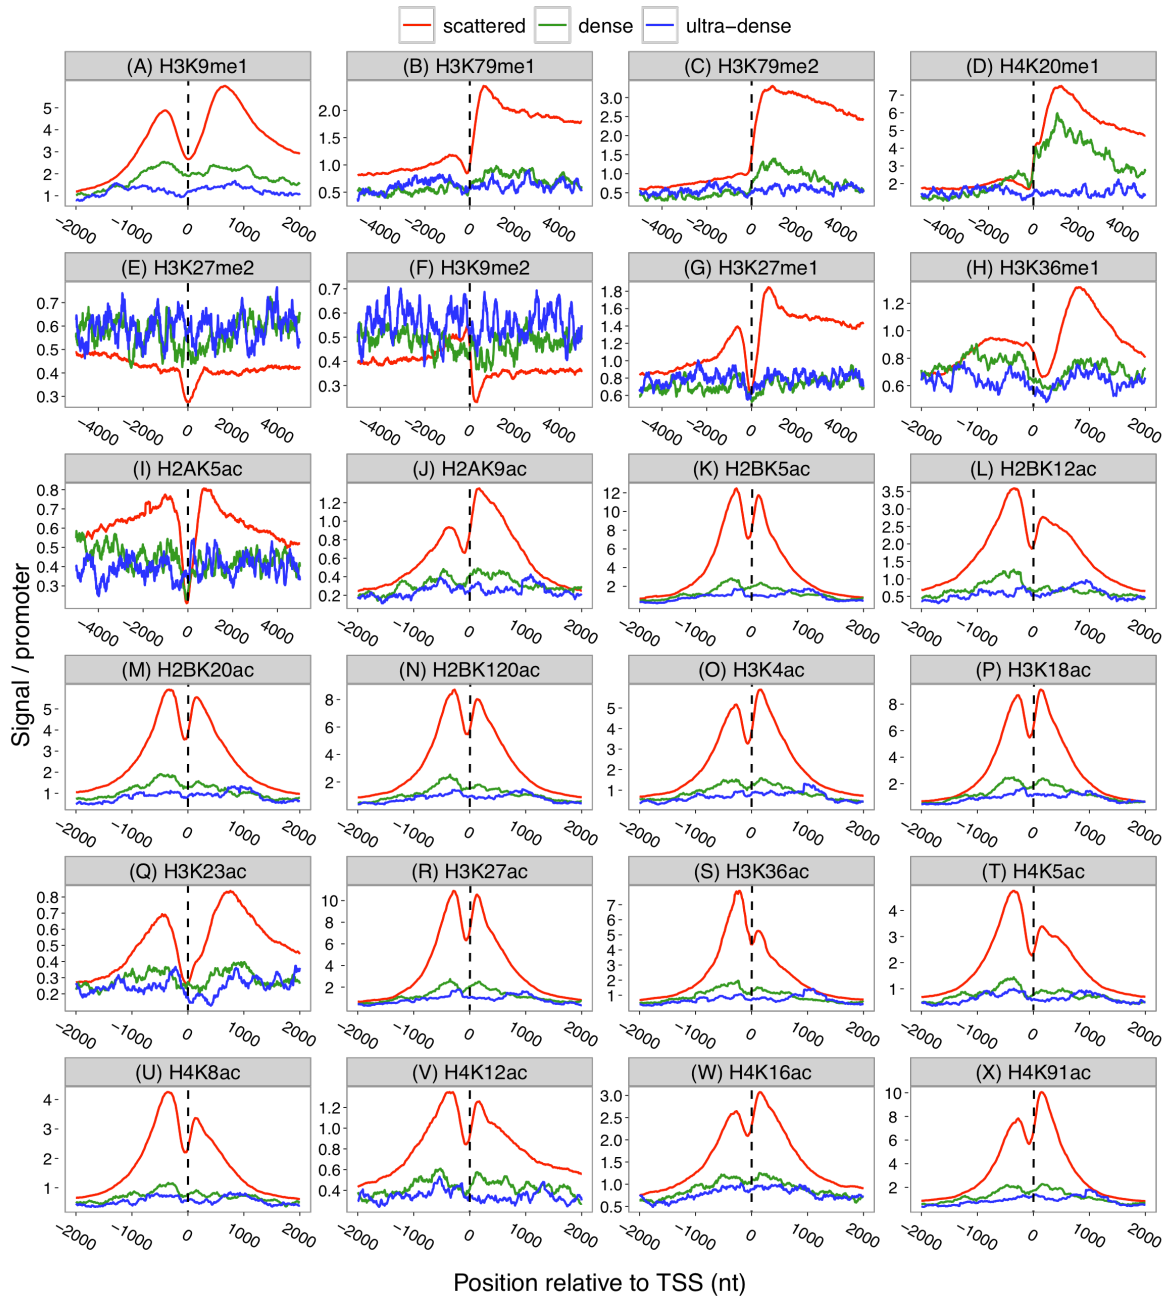

Supplement: pone.0023409.s012.pdf [file pone.0023409.s012.pdf]
