# Supplementary material for: Systematic Clustering of Transcription Start Site Landscapes
Source: PubMed Central journal article supplement (PMC3160847; doi:10.1371/journal.pone.0023409), 2011-08-24
Supplement: pone.0023409.s015.pdf [file pone.0023409.s015.pdf]

**Figure S8. Alignments of pseudo and transcribed genes promoters**

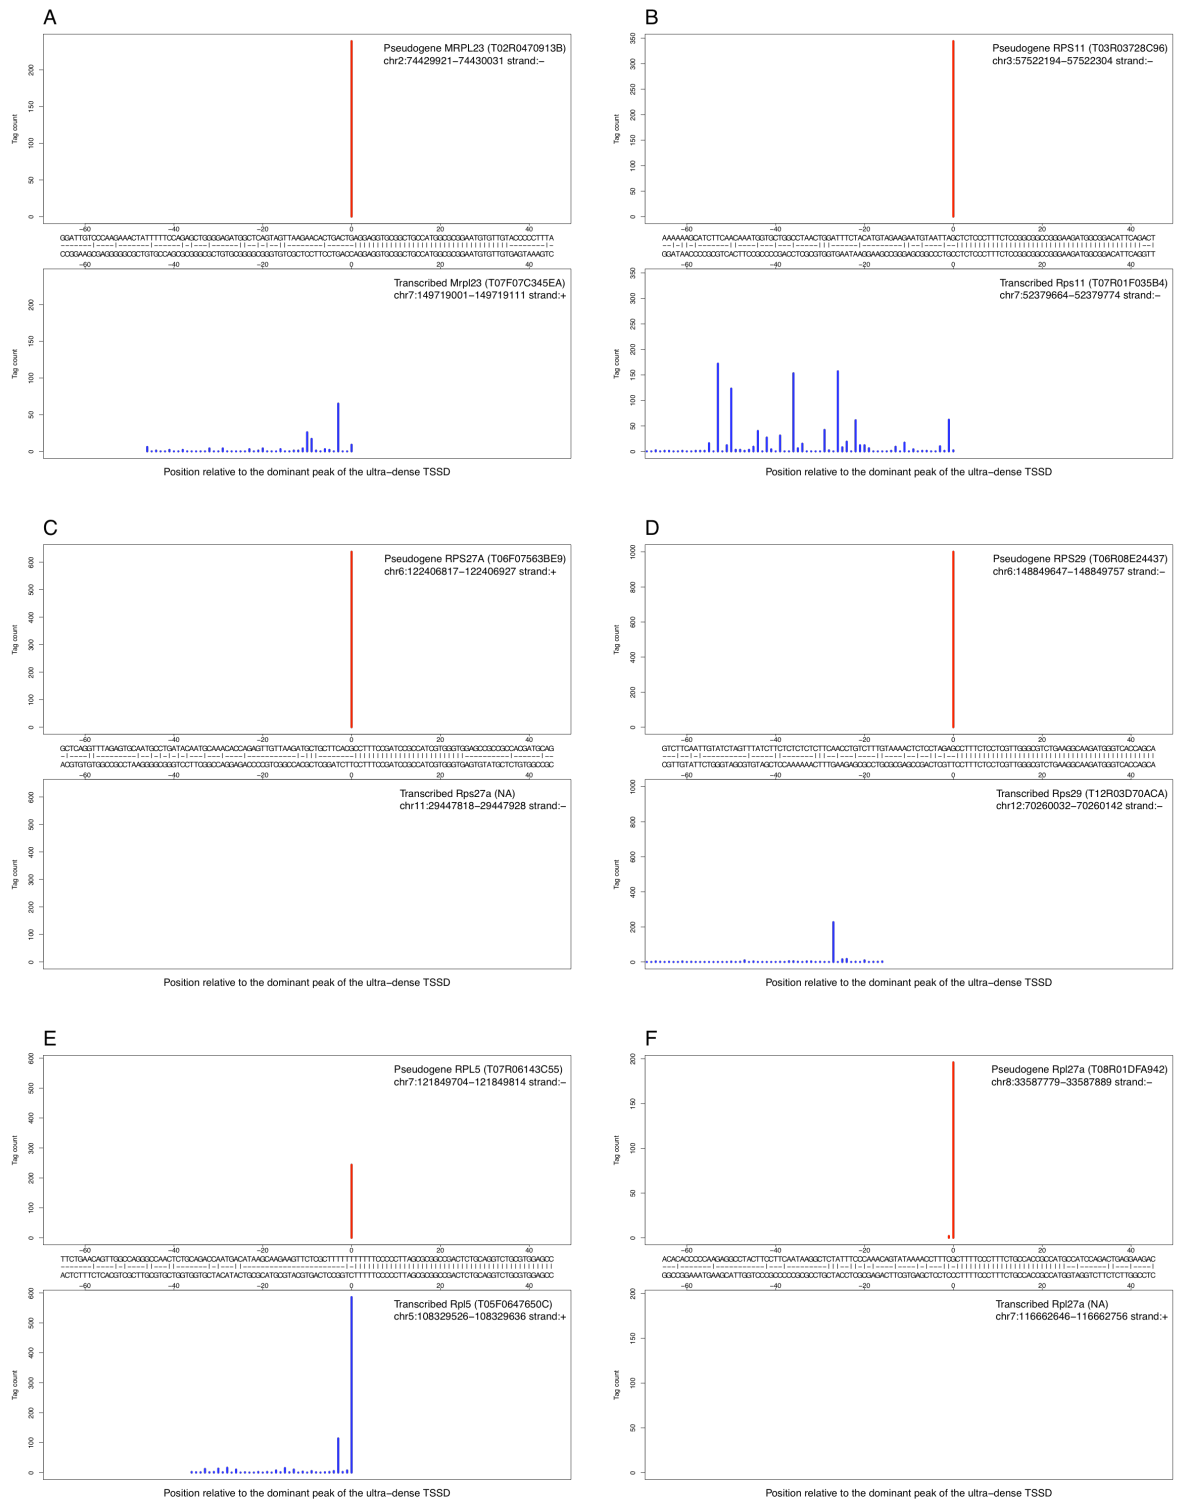



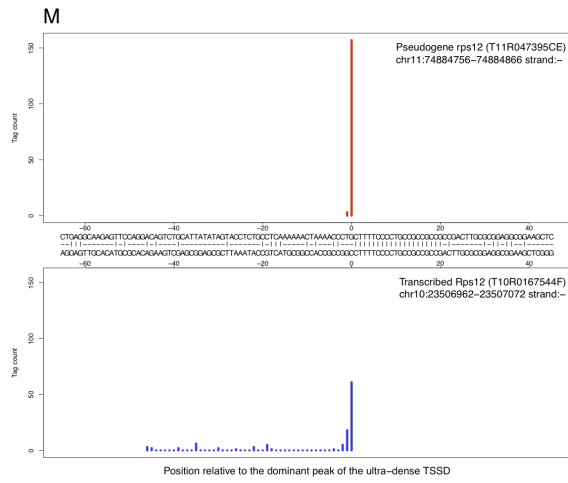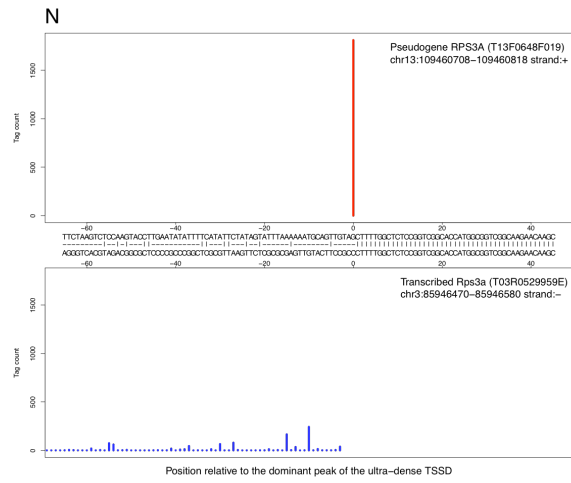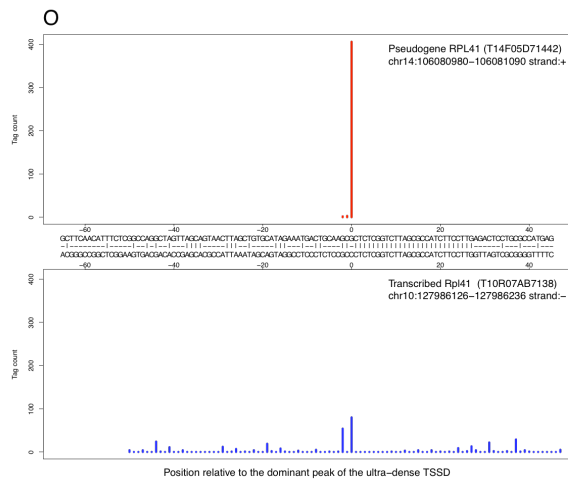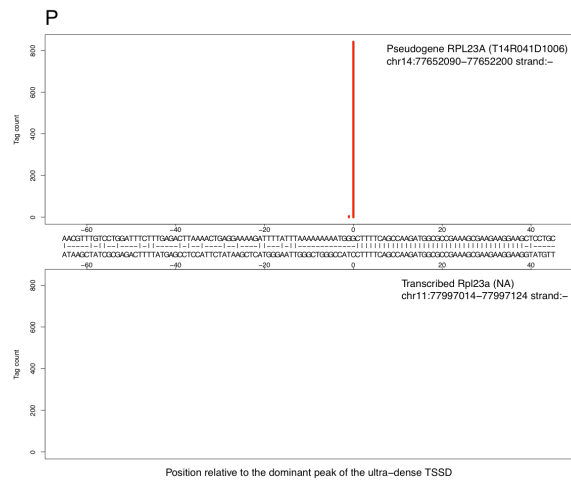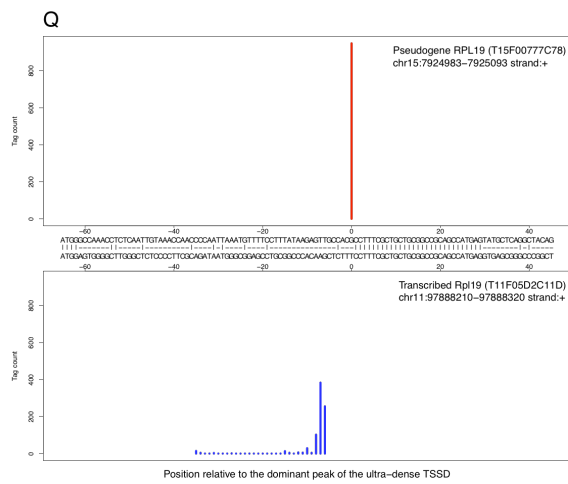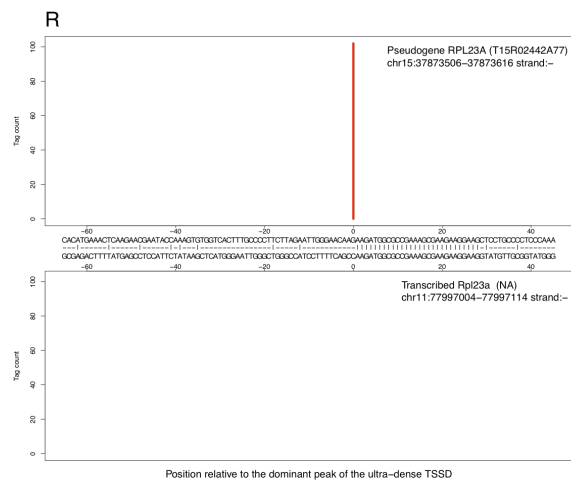

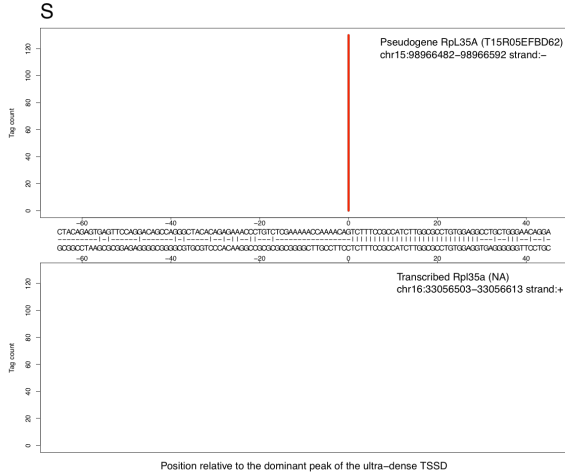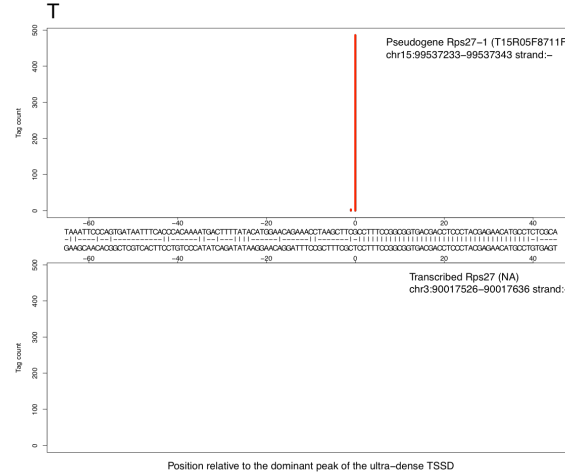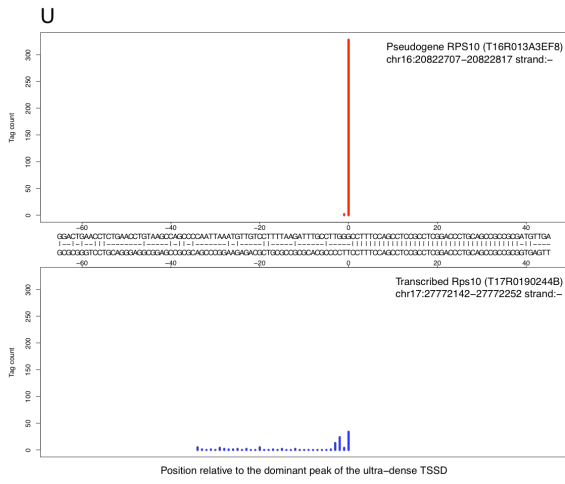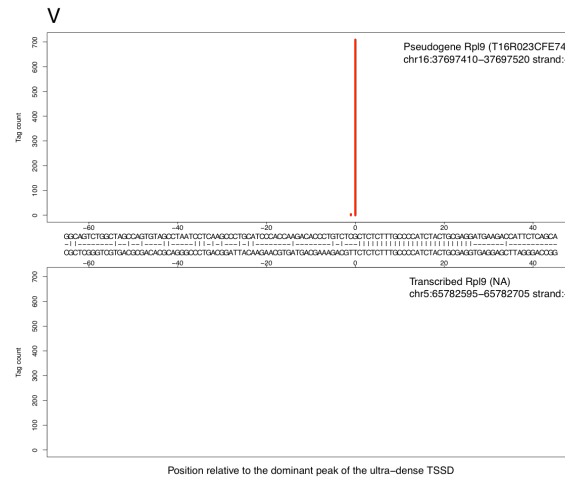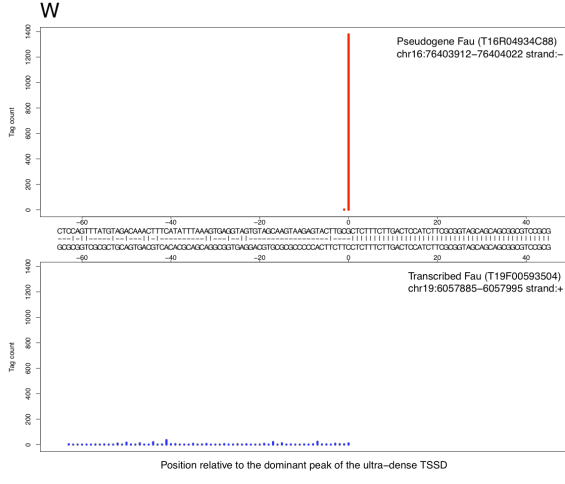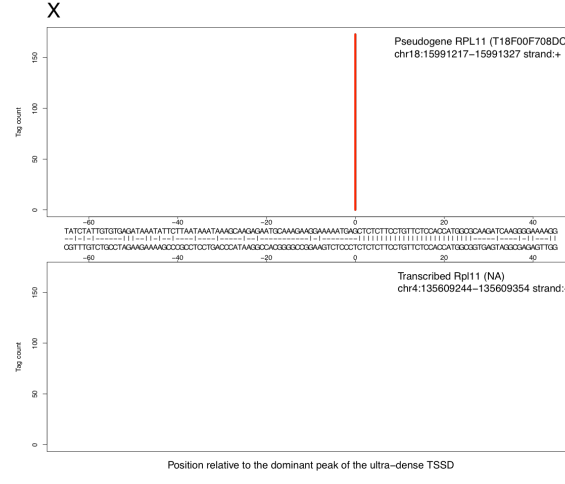

Y

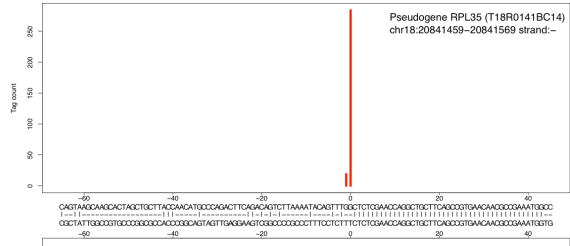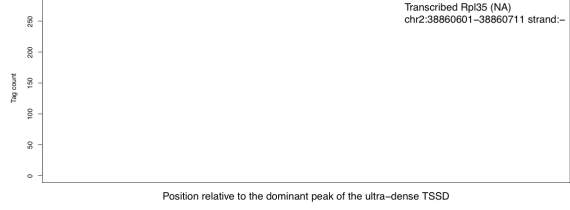

Position relative to the dominant peak of the ultra-dense TSSD
